# Supplementary material for: Medicinal plants popularly used in the Xingó region – a semi-arid location in Northeastern Brazil
Source: Springer Nature journal article supplement (doi:10.1186/1746-4269-2-15), 2006-03-23
Supplement: 13002_2006_27_MOESM1_ESM.pdf [file 13002_2006_27_MOESM1_ESM.pdf]

**Additional Material.** Medicinal plants cited by the population in two municipalities of the Xingó region (Northeastern Brazil). RI = Relative importance. \*All plants are preferentially used fresh.

| FAMILY/ SCIENTIFIC NAME<br>Common name                               | USES FORMS/ INDICATIONS                                           | PLANT COMPONENT*   | RI    | HERBARIUM NUMBER |
|----------------------------------------------------------------------|-------------------------------------------------------------------|--------------------|-------|------------------|
| ACANTHACEAE                                                          |                                                                   |                    |       |                  |
| <i>Ruellia asperula</i> (Ness) Lindau<br>Candeia or camará-candeia   | Macerated: Bronchitis, asthma, flu, fever, uterus inflammation    | Leaf, flower, root | 1.196 | 396, 397, 398    |
| <i>Ruellia</i> sp.                                                   | Macerated: Expel catarrh                                          | Leaf, flower       | 0.267 | 395, 400         |
| AMARANTHACEAE                                                        |                                                                   |                    |       |                  |
| <i>Alternanthera brasiliana</i> (L.) Kuntze<br>Terramicina           | Decoction: Numerous types of inflammations, worms                 | Leaf, flower       | 0.535 | 403, 404         |
| <i>Alternanthera</i> sp.1<br>Erva-branca                             | Decoction: Menstrual cramps                                       | Leaf, flower       | 0.267 | 402              |
| <i>Alternanthera</i> sp.2                                            | Decoction: Urinate keep, kidneys stone, sedative                  | Leaf, flower       | 0.678 | 405, 406         |
| AMARYLIDACEAE                                                        |                                                                   |                    |       |                  |
| <i>Amarylis beladona</i> L.<br>Cebola-braba                          | Syrup: Pneumonia, bronchitis                                      | Bulb               | 0.410 | 407              |
| ANACARDIACEAE                                                        |                                                                   |                    |       |                  |
| <i>Myracrodruon urundeuva</i> Fr. All.<br>Aroeira                    | Decoction/Bath: Numerous types of inflammations                   | Inner bark         | 0.267 | 411              |
| <i>Schinopsis brasiliensis</i> Engl.<br>Braúna                       | Decoction/Bath: Numerous types of inflammations, sexual impotence | Inner bark, leaf   | 0.535 | 409, 410         |
| <i>Spondias tuberosa</i> Arr. Cam.<br>Umbuzeiro                      | Decoction: Diabetes                                               | Inner bark         | 0.267 | 408              |
| APOCYNACEAE                                                          |                                                                   |                    |       |                  |
| <i>Allamanda blanchetti</i> A. DC.<br>Sete-patacas-roxas or jasminho | Infusion: Heart (Cardiac problems), high blood pressure           | Leaf, flower       | 0.410 | 419, 420         |
| <i>Aspidosperma pyrifolium</i> Mart.<br>Pereiro                      | Infusion: Diarrhea, sedative, heart (Cardiac problems)            | Inner bark, flower | 0.803 | 421              |
| <i>Mandevilla tenuifolia</i> Lindl.<br>Flor-de-Sto. Antonio          | Decoction: Heart (Cardiac problems)                               | Leaf, flower       | 0.267 | 412              |

|                                                                                |                                                                                                          |                           |       |                         |
|--------------------------------------------------------------------------------|----------------------------------------------------------------------------------------------------------|---------------------------|-------|-------------------------|
| <i>Skytanthus hancorniaefolius</i> Miers.                                      | Decoction: Sedative, insomnia, high blood pressure, heart (Cardiac problems), asthma, flu                | Inner bark, leaf, flower  | 1.357 | 413, 416, 417           |
| ARACEAE                                                                        |                                                                                                          |                           |       |                         |
| <i>Anthurium affine</i> Schott.<br>Folha-larga or palmeirão-brabo              | Decoction: Diabetes, heart (Cardiac problems), flu, blood make fine                                      | Leaf, flower              | 1.071 | 422, 424, 425, 426, 427 |
| <i>Dracontium</i> sp.<br>Milho-de-macaco                                       | Decoction or macerated: Rheumatism                                                                       | Leaf, root                | 0.267 | 423                     |
| ARISTOLOCHIACEAE                                                               |                                                                                                          |                           |       |                         |
| <i>Aristolochia brasiliensis</i> Mart. ex Zucc.<br>Jarrinha                    | Decoction: Menstrual cramps, Infusion/bath: uterus inflammation                                          | Whole plant, leaf, flower | 0.410 | 428, 827                |
| ASCLEPIADACEAE                                                                 |                                                                                                          |                           |       |                         |
| <i>Calotropis procera</i> (Willd.) R. Br.<br>Algodão-brabo or algodão-de-seda  | Decoction: Diarrhea, worm                                                                                | Flower, fruit             | 0.535 | 430                     |
| ASTERACEAE                                                                     |                                                                                                          |                           |       |                         |
| <i>Acanthospermum hispidum</i> DC.<br>Espinho-de-cigano or federação or rapina | Syrup: Bronchitis, asthma, pneumonia, Decoction: numerous types of inflammations, cancer (not specified) | Leaf, flower, root        | 1.089 | 437, 441                |
| <i>Argyrovernonia harley</i> (H. Rob.)<br>Macheish.<br>Moricica                | Decoction: Gastritis, ulcerous                                                                           | Leaf, root                | 0.410 | 439, 447, 449           |
| <i>Bidens</i> sp.                                                              | Decoction: Inflammation (Numerous types of inflammations)                                                | Leaf, flower              | 0.267 | 431                     |
| <i>Pluchea</i> sp.<br>Mar-de-cravo                                             | Decoction: High blood pressure, flu, kidneys infection                                                   | Leaf, flower, fruit       | 0.803 | 438                     |
| <i>Verbesina chalybaea</i> Mart. ex DC.<br>Balaio                              | Decoction: Dropsy, bladder infections                                                                    | Leaf, root                | 0.535 | 442                     |
| <i>Verbesina diversifolia</i> DC.<br>Assa-peixe                                | Decoction: Kidneys stone                                                                                 | Fruit, seed               | 0.267 | 446                     |
| BEGONIACEAE                                                                    |                                                                                                          |                           |       |                         |
| <i>Begonia reniformis</i> Dryand.                                              | Infusion: High blood pressure                                                                            | Flower                    | 0.267 | 451                     |
| BIGNONIACEAE                                                                   |                                                                                                          |                           |       |                         |
| <i>Tabebuia aurea</i> (Manso) Benth. & Hook.                                   | Decoction: Uterus inflammation, worm                                                                     | Inner bark, leaf          | 0.535 | 455                     |

|                                                                            |                                                                                                     |                          |       |               |
|----------------------------------------------------------------------------|-----------------------------------------------------------------------------------------------------|--------------------------|-------|---------------|
| F. ex S. Moore<br>Craibeira                                                |                                                                                                     |                          |       |               |
| <i>Tabebuia avellanedae</i> Lorentz ex Griseb.<br>Pau-d'arco-roxo          | Decoction/bath: Inflammation (Numerous types of inflammations), Decoction: heart (Cardiac problems) | Inner bark, flower       | 0.535 | 454           |
| BOMBACACEAE                                                                |                                                                                                     |                          |       |               |
| <i>Chorisia glaziovii</i> (O. Kuntze.)<br>Barriguda-de-espinho             | Decoction: Heart (Cardiac problems), high blood pressure                                            | Inner bark, flower       | 0.410 | 459           |
| BORAGINACEAE                                                               |                                                                                                     |                          |       |               |
| <i>Cordia globosa</i> (Jacq.) Kunth.<br>Chumbinho, piçarra or moleque-duro | Infusion or Syrup: Flu, hemorrhage, Decoction/gargle: sore throat                                   | Leaf, flower             | 0.803 | 460, 469      |
| <i>Cordia leucocephala</i> Moric.<br>Piçarra or Moleque-duro               | Infusion or Syrup: Sedative, hemorrhage, Decoction/gargle: sore throat                              | Inner bark, flower       | 0.803 | 462, 466      |
| <i>Cordia multispicata</i> Cham.<br>Chumbinho                              | Infusion or Syrup: Bronchitis, worm, high blood pressure                                            | Leaf, flower             | 0.803 | 464, 465      |
| <i>Cordia</i> cf. <i>tricotoma</i> (Vell.) Anab. ex Stend<br>Pau-de-morro  | Infusion or Syrup: Scar, high blood pressure                                                        | Inner bark, leaf, flower | 0.535 | 470, 471, 472 |
| <i>Cordia</i> sp.<br>Folha-larga                                           | Infusion or Syrup: Hemorrhoids                                                                      | Flower                   | 0.267 | 468           |
| <i>Heliotropium angiospermum</i> Murr.<br>Crista-de-galo                   | Infusion or Syrup: Heart (Cardiac problems), high blood pressure                                    | Leaf, flower, root       | 0.410 | 461, 467      |
| <i>Tournefortia rubicunda</i> Salzm.<br>Canudeiro                          | Infusion/bath: Mycosis, itching                                                                     | Leaf                     | 0.410 | 829           |
| BROMELIACEAE                                                               |                                                                                                     |                          |       |               |
| <i>Hohenbergia</i> sp.<br>Gravatá-de-folha-roxa                            | Decoction: High blood pressure, high cholesterol levels                                             | Leaf, flower             | 0.535 | 480           |
| <i>Tillandsia loliacea</i> Mart. ex Schult.<br>Barba-de-bode               | Decoction: Uterus hemorrhage, ulcerous                                                              | Whole plant              | 0.535 | 473, 479      |
| <i>Tillandsia recurvata</i> (L.) L.<br>Barba-de-bode-pequeno               | Decoction: Bloodshed                                                                                | Whole plant              | 0.267 | 475           |
| <i>Tillandsia streptocarpa</i> Baker<br>Braba-de-bode-grande               | Decoction: Heart (Cardiac problems)                                                                 | Whole plant              | 0.267 | 474           |
| CACTACEAE                                                                  |                                                                                                     |                          |       |               |

|                                                                       |                                                                                                           |                                 |       |                         |
|-----------------------------------------------------------------------|-----------------------------------------------------------------------------------------------------------|---------------------------------|-------|-------------------------|
| <i>Arrojadoa rhodantha</i> (Guerke) Br. et Rose<br>Rabo-de-raposa     | Decoction ou macerated: Heart (Cardiac problems), gastritis, spleen infection                             | Stem, root                      | 0.660 | 482, 487                |
| <i>Cereus jamacaru</i> DC.<br>Mandacaru                               | Macearado: Liver, kidneys infection                                                                       | Stem, fruit, root               | 0.535 | 486                     |
| <i>Opuntia palmadora</i> Br. et Rose<br>Quipá                         | Decoction: Asthma, worms, inflammation (Numerous types of inflammations)                                  | Stem                            | 0.803 | 488                     |
| <i>Pilosocereus gounellei</i> (Weber) Byl. et Rowl.<br>Xique-xique    | Decoction: Dropsy, prostate inflammation (Numerous types of inflammations)                                | Stem, flower                    | 0.535 | 485                     |
| <i>Pilosocereus tuberculatus</i> (Werdem.) Byl. et Rowl.<br>Caxacubri | Decoction: Kidneys infection                                                                              | Stem                            | 0.267 | 481, 483                |
| CAESALPINIACEAE                                                       |                                                                                                           |                                 |       |                         |
| <i>Bauhinia cheilantha</i> (Bong.) Stend.<br>Mororó                   | Decoction: Diabetes, inflammation (Numerous types of inflammations) blood make fine, sedative, rheumatism | Inner bark, leaf, flower        | 1.339 | 493, 494, 498, 504, 507 |
| <i>Caesalpinia ferrea</i> Mart. ex Tul.<br>Pau-ferro                  | Decoction: Sore throat, bronchitis, bloodness, swell, scar                                                | Inner bark, flower, fruit, seed | 1.339 | 495, 499, 505, 510      |
| <i>Caesalpinia microphylla</i> Mart.<br>Catingueira-rasteira          | Decoction or macerated: Sexual impotence, rheumatism                                                      | Inner bark, leaf                | 0.535 | 469, 513                |
| <i>Caesalpinia pulcherrima</i> L. Sw.<br>Maravilha                    | Decoction: Gastritis                                                                                      | Leaf, flower                    | 0.267 | 503                     |
| <i>Caesalpinia pyramidalis</i> Tul.<br>Catingueira                    | Decoction: Gases, bad digestion                                                                           | Leaf, flower                    | 0.410 | 491                     |
| <i>Chamaecrista flexuosa</i> (L.) Greene<br>Capim-de-cobra            | Decoction: Kidney infection                                                                               | Root                            | 0.267 | 501                     |
| <i>Parkinsonia aculeata</i> L.<br>Turco                               | Decoction or Infusion: Flu, asthma, diabetes, high blood pressure                                         | Inner bark, flower              | 1.071 | 500                     |
| <i>Peltogyne pauciflora</i> Benth.<br>Pau-de-morro or jatobá          | Decoction: Gases, flu, cough, sedative                                                                    | Leaf, flower                    | 1.071 | 463, 514                |
| <i>Senna obtusifolia</i> (Vogel.) H. S. Irwin & Barneby<br>Fedegoso   | Decoction: Ulcerous                                                                                       | Leaf, root                      | 0.267 | 509                     |

|                                                                                                 |                                                                                                                                                    |                                      |       |                              |
|-------------------------------------------------------------------------------------------------|----------------------------------------------------------------------------------------------------------------------------------------------------|--------------------------------------|-------|------------------------------|
| <i>Senna cf. occidentalis</i> (L.) Link.<br>Mata-pasto                                          | Decoction: Sore throat, bloodshed, gastritis, cancer                                                                                               | Leaf, root                           | 1.071 | 492, 497                     |
| <i>Senna splendida</i> (Vogel.) H. S. Irwin & Barneby<br>Feijão-brabo or canafistula            | Decoction: Kidneys infection, bronchitis, rheumatism, migraine, diarrhea, inflammation (Numerous types of inflammations), heart (Cardiac problems) | Inner bark, stem, leaf, flower, root | 1.875 | 502, 512, 517, 830           |
| <i>Senna</i> sp.1                                                                               | Decoction: Liver                                                                                                                                   | Leaf                                 | 0.267 | 515                          |
| <i>Senna</i> sp.2<br>Feijão-brabo                                                               | Decoction: Cough                                                                                                                                   | Leaf, flower                         | 0.267 | 516                          |
| CAPPARACEAE                                                                                     |                                                                                                                                                    |                                      |       |                              |
| <i>Capparis flexuosa</i> (L.) L.<br>Feijão-brabo                                                | Decoction: Flu, cough, pneumonia, rheumatism                                                                                                       | Leaf, flower, fruit                  | 0.928 | 529, 530, 531                |
| <i>Capparis jacobinae</i> Moric.<br>Icó-verdadeiro or icó-preto                                 | Decoction: Intoxication, fever, diabetes, diarrhea, pulmonary inflammation, bronchitis, heart (Cardiac problems)                                   | Leaf, flower, fruit                  | 1.589 | 520, 523, 524, 525, 526      |
| <i>Cleome diffusa</i> Banks. ex DC.<br>Mussambê or mussambê-pequeno or mussambê-amarelo-pequeno | Decoction: Expel catarrh, flu, bronchitis, asthma, high blood pressure, cough                                                                      | Whole plant, leaf, flower            | 1.178 | 518, 519, 522, 527, 528, 532 |
| <i>Cleome spinosa</i> Jacq.<br>Mussambê-branco                                                  | Decoction or Infusion: Flu, bronchitis                                                                                                             | Whole plant                          | 0.535 | 521                          |
| CELASTRACEAE                                                                                    |                                                                                                                                                    |                                      |       |                              |
| <i>Maytenus rigida</i> Mart.<br>Bom-nome                                                        | Decoction: Sexual impotence, rheumatism                                                                                                            | Leaf, flower                         | 0.535 | 533                          |
| COCHLOSPERMACEAE                                                                                |                                                                                                                                                    |                                      |       |                              |
| <i>Cochlospermum</i> sp.                                                                        | Decoction: Pneumonia, uterus inflammation                                                                                                          | Inner bark, leaf                     | 0.535 | 534                          |
| COMBRETACEAE                                                                                    |                                                                                                                                                    |                                      |       |                              |
| <i>Combretum cf. duarceanum</i> Cambess                                                         | Decoction: Expel catarrh                                                                                                                           | Leaf, flower                         | 0.267 | 535                          |
| <i>Combretum</i> sp.                                                                            | Decoction: Inflammation (Numerous types of inflammations), tumor                                                                                   | Stem, leaf                           | 0.535 | 536                          |
| COMMELINACEAE                                                                                   |                                                                                                                                                    |                                      |       |                              |
| <i>Commelina cf. erecta</i> L.<br>Erva-de-sta. Luzia                                            | Decoction: Diabetes, rheumatism, eye inflammation, high blood pressure                                                                             | Leaf, flower, root                   | 1.071 | 537, 538, 530, 540           |

|                                                                                |                                                                                   |                    |       |                       |
|--------------------------------------------------------------------------------|-----------------------------------------------------------------------------------|--------------------|-------|-----------------------|
| CONVOLVULACEAE                                                                 |                                                                                   |                    |       |                       |
| <i>Evolvulus</i> sp.1<br>Cipó-marrapé or erva-branca                           | Decoction: Sedative, diarrhea, liver                                              | Leaf, flower       | 0.660 | 542, 551              |
| <i>Jacquemontia</i> sp.<br>Cipó-marrapé or erva-de-besta                       | Infusion: Kidneys infection, bronchitis                                           | Leaf, flower, root | 0.535 | 550, 552              |
| <i>Ipomoea</i> sp.1<br>Algodão-preto                                           | Decoction: Liver                                                                  | Leaf, flower       | 0.267 | 545                   |
| <i>Ipomoea</i> sp.2<br>Cipó-cesto or batata-de-porco or<br>jitirana or salsa   | Decoction: High blood pressure, heart (Cardiac problems), sedative                | Leaf, flower       | 0.660 | 544, 555, 557,<br>548 |
| <i>Ipomoea</i> sp.3                                                            | Decoction: Sedative, high blood pressure, heart (Cardiac problems)                | Leaf, flower       | 0.660 | 547, 549, 553         |
| <i>Operculina</i> sp.<br>Batata-de-purga                                       | Decoction: Intestinal cleansing, pain tooth                                       | Root               | 0.535 | 546                   |
| CUCURBITACEAE                                                                  |                                                                                   |                    |       |                       |
| <i>Mormodica charantia</i> L.<br>Melão-de-São Caetano                          | Decoction/bath: Venereal disease, louse, scabies                                  | Leaf, flower       | 0.803 | 558, 561              |
| DIOSCOREACEAE                                                                  |                                                                                   |                    |       |                       |
| <i>Dioscorea sincorensis</i> R. Knuth<br>Salgueiro                             | Decoction: Kidneys infection, blodness, sore throat, diarrhea                     | Leaf, flower       | 1.071 | 563, 564              |
| ERITHROXYLACEAE                                                                |                                                                                   |                    |       |                       |
| <i>Erythroxylum revolutum</i> Mart.<br>Araça-brabo                             | Decoction: Aphrodisiac, heart (Cardiac problems), high blood pressure             | Leaf, flower       | 0.660 | 565                   |
| EUPHORBIACEAE                                                                  |                                                                                   |                    |       |                       |
| <i>Acalypha multicaulis</i> Muell. Arg.<br>Canela-de-nambu                     | Decoction: Hemorrhage, pain tooth, inflammation (Numerous types of inflammations) | Inner bark         | 0.660 | 585, 594              |
| <i>Acalypha</i> sp.<br>Canela-de-nambu                                         | Decoction: Venereal disease                                                       | Root               | 0.267 | 600                   |
| <i>Chamaesyce hyssopifolia</i> Small<br>Porca-parideira                        | Decoction: Flu, cough, gastritis, heart (Cardiac problems), to expel placenta     | Leaf, flower, root | 1.339 | 572, 590, 593,<br>599 |
| <i>Cnidocolus obtusifolius</i> Pohl.<br>Favela or orelha-de-onça or faveleira- | Infusion: Cancer, liver, tumor, uterus inflammation                               | Leaf, flower       | 0.928 | 571, 582              |

|                                                                                              |                                                                                         |                            |       |                    |
|----------------------------------------------------------------------------------------------|-----------------------------------------------------------------------------------------|----------------------------|-------|--------------------|
| mansa                                                                                        |                                                                                         |                            |       |                    |
| <i>Croton argyrophylloides</i> Müll. Arg.<br>Marmeleiro-branco                               | Decoction: Diabetes, inflammation (Numerous types of inflammations)                     | Decoction/bath: Inner bark | 0.535 | 573, 597           |
| <i>Croton glandulosus</i> L.                                                                 | Decoction: Nasal bloodshed, sinusitis                                                   | Leaf, flower               | 0.392 | 592                |
| <i>Croton micans</i> (Sw. em.) Muell. Arg.<br>Alecrim-de-vaqueiro                            | Infusion/bath: Hear, sedative, flu                                                      | Leaf, flower               | 0.803 | 579, 581           |
| <i>Croton rhamnifolius</i> Humb., Bonplan & Kunth<br>Pau-de-leite or velame                  | Infusion: Flu, cough                                                                    | Stem, leaf, flower         | 0.535 | 575, 576           |
| <i>Croton sonderianus</i> Müll. Arg.<br>Marmeleiro-preto                                     | Decoction: Stomachache, vomit (nausea), diarrhea                                        | Bark                       | 0.517 | 574                |
| <i>Euphorbia comosa</i> Vell<br>Barbaça                                                      | Macerated: Bronchitis, inflammation (Numerous types of inflammations), cirrhosis, liver | Leaf, flower, root         | 1.196 | 568, 577, 587, 595 |
| <i>Euphorbia phosphorea</i> Mart.<br>Pau-de-leite                                            | Decoction: Blood make fine                                                              | Stem                       | 0.267 | 584                |
| <i>Euphorbia</i> sp.<br>Bredo-de-porco                                                       | Decoction: Cramps, intestine infection                                                  | Root                       | 0.392 | 401                |
| <i>Jatropha mollissima</i> (Pohl.) Baill.<br>Pinhão-de-seda or pinhão-branco or pinhão-brabo | Macerated: Kidneys infection, appetite                                                  | Leaf, flower, fruit        | 0.535 | 567, 570, 589      |
| <i>Jatropha mutabilis</i> (Pohl.) Baill.<br>Pinhão-de-seda                                   | Decoction: Intestinal cleansing, blood cleansing                                        | Leaf, flower               | 0.535 | 580                |
| <i>Jatropha ribifolia</i> (Pohl.) Baill.<br>Pinhão or pinhão-de-seda                         | Decoction: Diabetes, uterus inflammation                                                | Leaf, flower               | 0.535 | 569, 601           |
| <i>Manihot glaziovii</i> Muell. Arg.<br>Maniçoba                                             | Macerated or Infusion: Headache, kidneys infection.                                     | Leaf, flower               | 0.803 | 583, 591           |
| <i>Sebastiania</i> sp.<br>Araça-brabo                                                        | Decoction: Diarrhea, kidneys infection, bronchitis                                      | Stem, leaf                 | 0.803 | 578, 598           |
| <i>Tragia</i> cf. <i>bahiensis</i> Muell. Arg.<br>Tamarina                                   | Decoction: Ulcerous                                                                     | Whole plant                | 0.267 | 596                |
| FABACEAE                                                                                     |                                                                                         |                            |       |                    |

|                                                                        |                                                                                         |                     |       |          |
|------------------------------------------------------------------------|-----------------------------------------------------------------------------------------|---------------------|-------|----------|
| <i>Andira</i> sp.<br>Angelim-amargoso                                  | Decoction: Blood make fine, high blood pressure                                         | Inner bark          | 0.535 | 605, 677 |
| <i>Dioclea grandiflora</i> Mart. ex Benth.<br>Mucunã                   | Fruto no umbigo: Umbilical hernia, Macerated/Bath: sedative, Macerated: flu, bronchitis | Leaf, flower, fruit | 1.071 | 609, 615 |
| <i>Dioclea</i> sp.<br>Mucunã                                           | Infusion: Blood make thin, flu, bronchitis, heart (Cardiac problems)                    | Leaf, flower, fruit | 1.071 | 604, 833 |
| <i>Erythrina velutina</i> Willd.<br>Mulungu                            | Decoction: Headache, fever, sedative, milk maternal production                          | Inner bark, flower  | 0.928 | 619      |
| <i>Indigofera</i> sp.<br>Anis-pequeno                                  | Decoction: Kidneys stone, sedative                                                      | Leaf, flower        | 0.535 | 607, 608 |
| <i>Macropitilium lathyroides</i> (L.) Urb.<br>Orelha-de-rato           | Decoction: Hemorrhage                                                                   | Leaf, flower        | 0.267 | 611      |
| FLACOURTIACEAE                                                         |                                                                                         |                     |       |          |
| <i>Casearia sylvestris</i> Swartz.                                     | Decoction/bath: Woman hemorrhage                                                        | Inner bark, flower  | 0.267 | 621      |
| LAMIACEAE                                                              |                                                                                         |                     |       |          |
| <i>Hyptis mutabilis</i> Briq.<br>Sambacaita                            | Decoction/bath: Uterus inflammation                                                     | Leaf, flower        | 0.267 | 622      |
| <i>Leonotis nepetifolia</i> (L.) R. Br.<br>Cravinho or cordão-de-frade | Decoction: Urinate keep                                                                 | Leaf, flower        | 0.267 | 630      |
| <i>Ocimum basilicum</i> L.<br>Manjeriçao-roxo                          | Decoction: Bronchitis, cough                                                            | Leaf, flower        | 0.410 | 623      |
| <i>Ocimum gratissimum</i> L.<br>Alfavaca or alfavaca-branco            | Infusion: Bad digestion, flu, cough                                                     | Leaf, flower        | 0.928 | 624, 629 |
| <i>Ocimum tenuiflorum</i> L.<br>Alfavaca                               | Decoction or Infusion: Cholesterol, high blood pressure                                 | Leaf, flower        | 0.535 | 626      |
| <i>Raphiodon echinus</i> (Nees & Mart.) Schauer.<br>Flor-de-urubu      | Decoction/bath: Uterus inflammation                                                     | Leaf, root          | 0.267 | 625      |
| LILIACEAE                                                              |                                                                                         |                     |       |          |
| <i>Smilax</i> sp.<br>Cipó-de-japacanga                                 | Macerated: Scar                                                                         | Flower, fruit       | 0.267 | 632      |
| LOASACEAE                                                              |                                                                                         |                     |       |          |

|                                                                            |                                                                                      |                     |       |               |
|----------------------------------------------------------------------------|--------------------------------------------------------------------------------------|---------------------|-------|---------------|
| <i>Loasa rupestris</i> Gardner<br>Urtiga-de-mocó                           | Decoction/bath: to expel placenta                                                    | Leaf, flower        | 0.267 | 633           |
| MALPIGHIACEAE                                                              |                                                                                      |                     |       |               |
| <i>Byrsonima gardneriana</i> Juss.<br>Murici                               | Decoction: Blood make fine, flu, sore throat                                         | Leaf, flower, fruit | 0.660 | 636, 637      |
| <i>Byrsonima</i> cf. <i>intermedia</i> Juss.<br>Pitombinha or cipó-de-rego | Decoction: Gallstone, Kidneys stone, prostate inflammation, bad digestion, worm      | Leaf, flower        | 1.053 | 638, 640, 647 |
| <i>Byrsonima</i> sp.<br>Murici                                             | Decoction: Flu, sore throat                                                          | Leaf, flower        | 0.410 | 643           |
| <i>Galphimia</i> sp.                                                       | Decoction: Sore throat, bronchitis, hoarseness, urinate keep, worm                   | Leaf, flower, fruit | 1.196 | 639, 642, 645 |
| MALVACEAE                                                                  |                                                                                      |                     |       |               |
| <i>Gaya aurea</i> St. -Hill.                                               | Infusion: Bad digestion                                                              | Leaf, flower        | 0.267 | 654           |
| <i>Herissantia tiubae</i> (K. Schum.) Briz.<br>Lava-prato                  | Infusion: Flu, fever                                                                 | Leaf, flower        | 0.535 | 649           |
| <i>Sida cordifolia</i> L.<br>Malva-amarela or mela-bode                    | Decoction: Kidneys infection                                                         | Root                | 0.267 | 650           |
| <i>Sida</i> sp.1<br>Barba-de-boi                                           | Infusion: Bad digestion, gases                                                       | Leaf, flower        | 0.410 | 652           |
| <i>Sida</i> sp.2<br>Malva-branca                                           | Decoction/bath: Scar                                                                 | Leaf, flower        | 0.267 | 651           |
| MARCGRAVIACEAE                                                             |                                                                                      |                     |       |               |
| <i>Norantia brasiliensis</i> Choisy                                        | Decoction: Heart (Cardiac problems)                                                  | Leaf, flower        | 0.267 | 658           |
| MELIACEAE                                                                  |                                                                                      |                     |       |               |
| <i>Melia azedarach</i> L.<br>Lírio                                         | Syrup: Flu, high blood pressure                                                      | Flower              | 0.535 | 660, 834      |
| MIMOSACEAE                                                                 |                                                                                      |                     |       |               |
| <i>Acacia bahiensis</i> Benth.<br>Carcará or angico-monjolo                | Infusion: Uterus infection, blood make fine, rheumatism, epidermis, venereal disease | Inner bark, flower  | 1.339 | 662, 665, 678 |
| <i>Acacia</i> sp.<br>Espinheiro-branco                                     | Decoction/bath: Uterus infection                                                     | Inner bark          | 0.267 | 671           |
| <i>Anadenanthera colubrina</i> (Vell.) Brenan                              | Decoction or Syrup: Bronchitis, pulmonary                                            | Inner bark          | 0.660 | 672, 675      |

|                                                                                    |                                                                                             |                          |       |               |
|------------------------------------------------------------------------------------|---------------------------------------------------------------------------------------------|--------------------------|-------|---------------|
| Angico-de-carço                                                                    | inflammation, flu                                                                           |                          |       |               |
| <i>Chloroleucon</i> sp.<br>Arapiraca                                               | Decoction: Heart (Cardiac problems)                                                         | Inner bark, flower       | 0.267 | 666, 676      |
| <i>Mimosa caesalpinifolia</i> Benth.<br>Cascudo                                    | Decoction or macerated: Inflammation (Numerous types of inflammations), high blood pressure | Inner bark, flower       | 0.535 | 669           |
| <i>Mimosa tenuiflora</i> (Willd.) Poir.<br>Jurema-preta                            | Decoction: Inflammation (Numerous types of inflammations), fever, menstrual cramps          | Inner bark, flower       | 0.660 | 670           |
| <i>Mimosa</i> sp.<br>Jurema-branca                                                 | Decoction or Syrup: Asthma, flu                                                             | Inner bark, flower       | 0.535 | 680           |
| <i>Paraspiptadenia zehntneri</i> (Harms) M. P. Lima & H. C. Lima<br>Angico-monjola | Decoction/bath: Flu, uterus inflammation                                                    | Inner bark               | 0.535 | 667           |
| <i>Piptadenia</i> sp.1<br>Arranhento                                               | Decoction: Sedative, high blood pressure                                                    | Inner bark, leaf, flower | 0.534 | 668, 674      |
| <i>Piptadenia</i> sp.2<br>Angelim-verdadeiro                                       | Decoction: Gastritis                                                                        | Inner bark               | 0.267 | 664           |
| <i>Pithecellobium diversifolium</i> Benth.<br>Corcarozeiro                         | Decoction: Diabetes, bronchitis,<br>Decoction/bath: uterus inflammation                     | Inner bark               | 0.803 | 661, 673, 681 |
| MYRTACEAE                                                                          |                                                                                             |                          |       |               |
| <i>Eugenia citrifolia</i> Poiret.<br>Araça-verdadeiro                              | Decoction: Migraine, heart (Cardiac problems)                                               | Leaf                     | 0.535 | 682           |
| NYCTAGINACEAE                                                                      |                                                                                             |                          |       |               |
| <i>Boerhavia diffusa</i> L.<br>Pega-pinto                                          | Decoction/bath: Genital secretion, genital infection                                        | Root                     | 0.535 | 683           |
| OLACACEAE                                                                          |                                                                                             |                          |       |               |
| <i>Ximenia americana</i> L.<br>Ameixa                                              | Decoction or tincture: Inflammation (Numerous types of inflammations), bloodshed, backache  | Inner bark               | 0.803 | 684           |
| ONAGRACEAE                                                                         |                                                                                             |                          |       |               |
| <i>Ludwigia</i> sp.                                                                | Decoction: Liver, stomachache                                                               | Flower. fruit            | 0.410 | 685           |
| OXALIDACEAE                                                                        |                                                                                             |                          |       |               |

|                                                          |                                                             |                         |       |                    |
|----------------------------------------------------------|-------------------------------------------------------------|-------------------------|-------|--------------------|
| <i>Oxalis</i> sp.1<br>Umbuzeirinho                       | Decoction: Asthma, flu, cough, intestinal cleansing         | Leaf, flower, root      | 0.958 | 687, 688, 689, 692 |
| <i>Oxalis</i> sp.2<br>Azedinho                           | Decoction: Expel catarrh, prostate inflammation             | Leaf, flower, root      | 0.535 | 690, 692           |
| PAPAVERACEAE                                             |                                                             |                         |       |                    |
| <i>Argemone mexicana</i> L.<br>Cardinho or cardo-santo   | Decoction: Pneumonia, uterus inflammation                   | Whole plant, leaf, root | 0.535 | 693, 694           |
| PASSIFLORACEAE                                           |                                                             |                         |       |                    |
| <i>Passiflora foetida</i> L.<br>Maracujá-papoco          | Decoction or Infusion: Heart (Cardiac problems), sedative   | Leaf, flower            | 0.535 | 696, 697, 698      |
| <i>Passiflora</i> sp.<br>Margarida                       | Decoction: Sedative, high blood pressure                    | Leaf, flower            | 0.535 | 695                |
| PHYTOLACACEAE                                            |                                                             |                         |       |                    |
| <i>Petiveria</i> sp.<br>Tipi                             | Infusion: Sedative, heart (Cardiac problems)                | Leaf, flower            | 0.535 | 700                |
| <i>Microtea</i> sp.<br>Angélica-rasteira                 | Decoction: Sedative, to expel placenta                      | Leaf, flower, root      | 0.535 | 699, 701, 702      |
| PLUMBAGINACEAE                                           |                                                             |                         |       |                    |
| <i>Plumbago</i> sp.                                      | Decoction: Cramps, sedative, urinary infection, stomachache | Leaf, flower, root      | 0.928 | 704, 705, 706      |
| POLYGALACEAE                                             |                                                             |                         |       |                    |
| <i>Polygala</i> sp.<br>Pé-de-urubu or gelol or mudubinha | Decoction: Stoke, dismenorrhoea                             | Whole plant             | 0.535 | 711, 712           |
| PONTEDERIACEAE                                           |                                                             |                         |       |                    |
| <i>Eichhornia paniculata</i> Kunth.                      | Decoction: Hemorrhoids                                      | Leaf                    | 0.267 | 713                |
| PORTULACACEAE                                            |                                                             |                         |       |                    |
| <i>Portulaca</i> sp.1<br>Beldroega                       | Decoction: Kidneys infection                                | Root                    | 0.267 | 719                |
| <i>Portulaca</i> sp.2<br>Beldroega or bico-de-urubu      | Decoction: Kidneys stone, gallstone                         | Root                    | 0.535 | 715, 716, 717      |
| <i>Portulaca</i> sp.3<br>Beldroega                       | Decoction: Eye inflammation, kidneys infection              | Flower, root            | 0.535 | 721                |

|                                                                         |                                                                                                     |                                    |       |                       |
|-------------------------------------------------------------------------|-----------------------------------------------------------------------------------------------------|------------------------------------|-------|-----------------------|
| <i>Portulaca</i> sp.4<br>Beldroega                                      | Decoction: Kidneys infection                                                                        | Leaf, flower, root                 | 0.267 | 714, 722              |
| <i>Talinum paniculatum</i> Gaertn.<br>Bredo                             | Decoction: Prostate inflammation                                                                    | Whole plant                        | 0.267 | 720                   |
| <i>Talinum</i> sp.<br>Bredo                                             | Decoction: Kidney infection                                                                         | Root                               | 0.267 | 718                   |
| PUNICACEAE                                                              |                                                                                                     |                                    |       |                       |
| <i>Punica granatum</i> L.<br>Romã                                       | Decoction/gargle: Sore throat                                                                       | Fruit                              | 0.267 | 723                   |
| RHAMNACEAE                                                              |                                                                                                     |                                    |       |                       |
| <i>Gouania latifolia</i> Reiss                                          | Decoction: Uterus inflammation, backache                                                            | Inner bark, leaf                   | 0.535 | 727                   |
| <i>Ziziphus juazeiro</i> Mart.<br>Juazeiro                              | Decoction: Flu, stomachache, bad digestion,<br>Syrup: pneumonia, tuberculosis, bronchitis           | Inner bark, bark,<br>fruit         | 1.178 | 724, 725, 726,<br>728 |
| RUBIACEAE                                                               |                                                                                                     |                                    |       |                       |
| <i>Emmeorrhiza umbelata</i> (Spreng) K. Schu.                           | Decoction: Intoxication                                                                             | Flower, fruit                      | 0.267 | 746                   |
| <i>Guettarda</i> sp.                                                    | Decoction: Stomachache, inflammation<br>(Numerous types of inflammations)                           | Leaf, flower                       | 0.535 | 742                   |
| <i>Tocoyena formosa</i> (Cham. & Schltdl.) K.<br>Schum.<br>Jenipaparana | Infusion: Liver, urinary infection, rheumatism,<br>heart (Cardiac problems)                         | Inner bark, leaf,<br>flower, fruit | 1.071 | 734, 736, 739         |
| <i>Richardia</i> sp.<br>Erva-de-besta                                   | Decoction: Intestinal cleansing, sore throat,<br>bronchitis, nasal bloodshed, rheumatism            | Flower, root                       | 1.195 | 729, 731, 733,<br>748 |
| SAPINDACEAE                                                             |                                                                                                     |                                    |       |                       |
| <i>Allophylus quercifolius</i> (Mart. ) Rasdlk.                         | Decoction: Ulcerous                                                                                 | Leaf, flower                       | 0.267 | 756                   |
| <i>Cardiospermum coridum</i> L.<br>Timbó                                | Decoction: Ulcerous                                                                                 | Leaf, flower, fruit                | 0.267 | 757, 758              |
| <i>Cardiospermum oliveirae</i> Ferruci.<br>Cipó-cruapé or timbó         | Decoction: Ulcerous, to expel placenta,<br>inflammation (Numerous types of<br>inflammations), tumor | Stem, leaf, flower                 | 1.071 | 755, 759, 762         |
| <i>Serjania</i> sp.1<br>Timbó                                           | Decoction: Ovary inflammation, scar, ulcerous,<br>cramps                                            | Leaf, flower                       | 1.071 | 752, 754, 760,<br>763 |
| <i>Serjania</i> sp.2                                                    | Decoction: Cancer (not specified)                                                                   | Leaf, flower                       | 0.267 | 761                   |

|                                                                      |                                                                                                                       |                     |       |                    |
|----------------------------------------------------------------------|-----------------------------------------------------------------------------------------------------------------------|---------------------|-------|--------------------|
| Salgueiro                                                            |                                                                                                                       |                     |       |                    |
| SAPOTACEAE                                                           |                                                                                                                       |                     |       |                    |
| <i>Sideroxylum obtusifolium</i> (Roem. & Schult.)Penn.<br>Quixabeira | Decoction: Gastritis, stroke, inflammation (Numerous types of inflammations),<br>Decoction/bath: genital inflammation | Inner bark          | 1.071 | 764, 765           |
| SCROPHULARIACEAE                                                     |                                                                                                                       |                     |       |                    |
| <i>Angelonia</i> sp.1                                                | Decoction: Kidneys infection                                                                                          | Root                | 0.267 | 768                |
| <i>Angeloia</i> sp.2                                                 | Decoction: Inflammation (Numerous types of inflammations)                                                             | Leaf, flower        | 0.267 | 767                |
| <i>Angelonia</i> sp.3                                                | Decoction: high Cholesterol levels                                                                                    | Leaf, flower        | 0.267 | 769                |
| SIMARUBACEAE                                                         |                                                                                                                       |                     |       |                    |
| <i>Simaba mayana</i> Casar<br>Pratudo                                | Decoction: Inflammation (Numerous types of inflammations), stroke                                                     | Leaf                | 0.535 | 770                |
| SOLANACEAE                                                           |                                                                                                                       |                     |       |                    |
| <i>Nicotiana glauca</i> L.                                           | Decoction: Bad digestion, Decoction/bath: uterus inflammation                                                         | Leaf, flower        | 0.535 | 774, 776           |
| <i>Solanum americanum</i> L.                                         | Decoction: Sore throat                                                                                                | Leaf, flower        | 0.267 | 771                |
| <i>Solanum</i> sp.1<br>Jurubeba                                      | Decoction: Kidneys inflammation                                                                                       | Stem, leaf, flower  | 0.267 | 775                |
| <i>Solanum</i> sp.2<br>Tomatinho-do-campo                            | Decoction: Kidneys inflammation                                                                                       | Leaf, flower, fruit | 0.267 | 772                |
| STERCULIACEAE                                                        |                                                                                                                       |                     |       |                    |
| <i>Byttneria</i> sp.                                                 | Decoction: Flu, asthma, diabetes, high blood pressure                                                                 | Inner bark, flower  | 1.071 | 751                |
| <i>Melochia tomentosa</i> L.<br>Malva-vermelha                       | Infusion: Flu, cold, bronchitis, pulmonary inflammation                                                               | Leaf, flower        | 0.785 | 777, 779, 780, 782 |
| <i>Melochia</i> sp.<br>Malva-branca                                  | Infusion: Flu, liver                                                                                                  | Leaf, flower        | 0.535 | 778                |
| <i>Walteria</i> sp.<br>Malva-branca                                  | Infusion: Scar                                                                                                        | Leaf, flower        | 0.267 | 781                |
| TURNERACEAE                                                          |                                                                                                                       |                     |       |                    |
| <i>Turnera</i> sp.                                                   | Decoction: Intestinal cleansing, bronchitis                                                                           | Leaf, flower        | 0.535 | 783, 785           |

|                                                                                                   |                                                                                                                                              |                     |       |                                   |
|---------------------------------------------------------------------------------------------------|----------------------------------------------------------------------------------------------------------------------------------------------|---------------------|-------|-----------------------------------|
| Flor-de-catenga or chanana                                                                        |                                                                                                                                              |                     |       |                                   |
| UMBELIFERAE                                                                                       |                                                                                                                                              |                     |       |                                   |
| <i>Anethum graveolens</i> L.<br>Endro                                                             | Infusion: Diarrhea                                                                                                                           | Flower              | 0.267 | 789                               |
| URTICACEAE                                                                                        |                                                                                                                                              |                     |       |                                   |
| <i>Dendrocnide</i> sp.<br>Urtiga                                                                  | Decoction: Ulcerous                                                                                                                          | Whole plant         | 0.267 | 791                               |
| VERBENACEAE                                                                                       |                                                                                                                                              |                     |       |                                   |
| <i>Lantana</i> sp.<br>Camará or chumbinho or moleque-duro                                         | Decoction: Flu, fever, asthma, cough, bronchitis, diabetes, high blood pressure, sedative                                                    | Leaf, flower        | 1.857 | 792, 793, 798, 804                |
| <i>Lippia</i> sp.<br>Alecrim-de-vaqueiro or alecrim-de-caboclo or alecrim-pimenta or chumbinho    | Decoction: Flu, heart (Cardiac problems), Syrup: bronchitis, expel catarrh, pulmonary inflammation, pneumonia, Decoction/gargle: sore throat | Leaf, flower        | 1.428 | 794, 796, 800, 801, 803, 805, 806 |
| <i>Stachytarfeta</i> sp.                                                                          | Decoction: Urinate keep, kidneys infection                                                                                                   | Whole plant         | 0.535 | 797                               |
| VITACEAE                                                                                          |                                                                                                                                              |                     |       |                                   |
| <i>Cissus bahiensis</i> Lombardi                                                                  | Decoction: Sexual impotence, rheumatism                                                                                                      | Leaf, flower        | 0.535 | 815                               |
| <i>Cissus decidua</i> Lombardi<br>Embiratanha                                                     | Decoction: Cancer (not specified), uterus inflammation                                                                                       | Stem, leaf, flower  | 0.535 | 814                               |
| <i>Cissus erosa</i> L. C. Rich.<br>Cipó-parreiro                                                  | Decoction: Liver, Decoction/bath: menstrual cramps                                                                                           | Leaf, flower        | 0.535 | 810                               |
| <i>Cissus simsiana</i> Schult. & Schult. F.<br>Cipó-parreira                                      | Decoction: Intestinal cleansing, high blood pressure                                                                                         | Leaf, flower        | 0.660 | 808, 812, 813                     |
| <i>Cissus verticillata</i> subsp. <i>verticillata</i> (L.)<br>Nicolson & C. E. Jarvis<br>Insulina | Decoction: Cirrhosis, liver, diabetes, cholesterol                                                                                           | Leaf, flower, fruit | 0.928 | 809, 811                          |
| ZIGOPHILACEAE                                                                                     |                                                                                                                                              |                     |       |                                   |
| <i>Kallstroemia tribuloides</i> Wight & Arn.                                                      | Decoction: Heart (Cardiac problems)                                                                                                          | Root                | 0.267 | 816                               |

|                                           |                                              |      |       |     |
|-------------------------------------------|----------------------------------------------|------|-------|-----|
| ZINGIBERACEAE                             |                                              |      |       |     |
| <i>Alpinia speciosa</i> Schum.<br>Colônia | Infusion: Migraine, heart (Cardiac problems) | Leaf | 0.535 | 817 |
